# Supplementary material for: Women’s childbirth experiences in the Swedish Post-term Induction Study (SWEPIS): a multicentre, randomised, controlled trial
Source: HighWire-hosted journal article supplement (doi:10.1136/bmjopen-2020-042340), 2021-04-01

**Supplementary material, Figure A**

Flowchart of participants in the two randomised groups rating their overall childbirth experience on a VAS (1-10) within 3 days of delivery

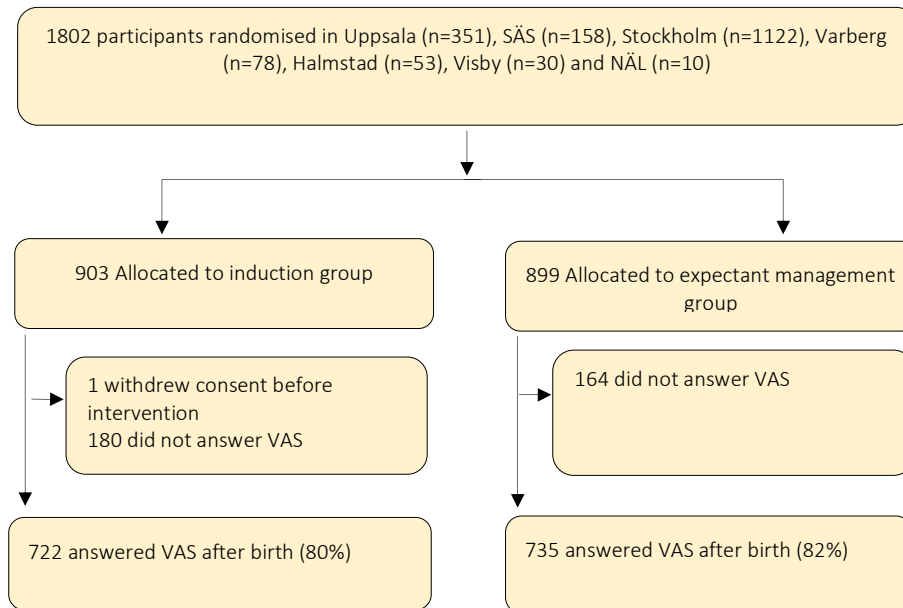

Supplement: bmjopen-2020-042340supp002_data_supplement.pdf [file bmjopen-2020-042340supp002_data_supplement.pdf]
