# Supplementary material for: Women’s childbirth experiences in the Swedish Post-term Induction Study (SWEPIS): a multicentre, randomised, controlled trial
Source: HighWire-hosted journal article supplement (doi:10.1136/bmjopen-2020-042340), 2021-04-01
Supplement: bmjopen-2020-042340supp003_data_supplement.pdf [file bmjopen-2020-042340supp003_data_supplement.pdf]

**Supplementary material, Table B**

Baseline characteristics for participants responding to a VAS (1-10) on overall childbirth experience, not responding to VAS, and total VAS population of women participating in SWEFIS.

| Variables                                             | Participants responding to VAS |                                        | Participants not responding to VAS |                                        | Total VAS population       |                                        |
|-------------------------------------------------------|--------------------------------|----------------------------------------|------------------------------------|----------------------------------------|----------------------------|----------------------------------------|
|                                                       | Induction group<br>n=722       | Expectant<br>management group<br>n=735 | Induction group<br>n=180           | Expectant<br>management group<br>n=164 | Induction group<br>n=902   | Expectant<br>management group<br>n=899 |
| <b>Age at randomisation</b><br>(years)                |                                |                                        |                                    |                                        |                            |                                        |
| Mean (SD)                                             | 31.3 (4.7)                     | 31.3 (4.7)                             | 31.5 (4.4)                         | 31.7 (4.3)                             | 31.3 (4.6)                 | 31.0 (4.6)                             |
| Median (interquartile<br>range)                       | 31.2 (28; 35)                  | 31.2 (28; 35)                          | 31.5 (28; 34)                      | 31.5 (29; 35)                          | 31.2 (28; 34.6)            | 30.9 (28; 34.2)                        |
| < 35 years                                            | 567 (78.5%)                    | 567 (78.5%)                            | 141 (78.3%)                        | 127 (77.4%)                            | 708 (78.5%)                | 716 (79.6%)                            |
| ≥ 35 years                                            | 155 (21.5%)                    | 155 (21.5%)                            | 39 (21.7%)                         | 37 (22.6%)                             | 194 (21.5%)                | 183 (20.4%)                            |
| <b>Parity (includes stillborn or<br/>live births)</b> |                                |                                        |                                    |                                        |                            |                                        |
| Primiparous                                           | 402 (55.7%)                    | 407 (55.4%)                            | 91 (50.6%)                         | 94 (57.3%)                             | 493 (54.7%)                | 501 (55.7%)                            |
| Multiparous                                           | 320 (44.3%)                    | 328 (44.6%)                            | 89 (49.4%)                         | 70 (42.7%)                             | 402 (45.3%)                | 398 (44.3%)                            |
| <b>Smoking at first antenatal<br/>visit</b>           |                                |                                        |                                    |                                        |                            |                                        |
| No                                                    | 678/695 (97.6%)                | 686/707 (97.0%)                        | 172/175 (98.3%)                    | 154/160 (96.3%)                        | 850/870 (97.7%)            | 840/867 (96.9%)                        |
| Yes                                                   | 17/695 (2.0%)                  | 21/707 (2.0%)                          | 3/175 (1.7%)                       | 6/160 (3.8%)                           | 20/870 (2.3%)              | 27/867 (3.1%)                          |
| <b>BMI at first antenatal visit</b>                   |                                |                                        |                                    |                                        |                            |                                        |
| Mean (SD)                                             | 24.7 (4.4)                     | 25.1 (4.9)                             | 25.2 (5.1)                         | 24.6 (4.2)                             | 24.8 (4.6)                 | 25.0 (4.8)                             |
| Median (interquartile<br>range)                       | 23.8 (21.7; 26.7)<br>n=695     | 24 (21.6; 27.5)<br>n=692               | 23.7 (22; 28)<br>n=170             | 23.7 (22; 27)<br>n=156                 | 23.8 (21.7; 26.8)<br>n=865 | 23.9 (21.6; 27.2)<br>n=848             |
| <b>Region of birth</b>                                |                                |                                        |                                    |                                        |                            |                                        |
| Sweden                                                | 562/683 (82.3%)                | 581/697 (83.4%)                        | 130/161 (80.7%)                    | 120/152 (78.9%)                        | 692/844 (82.0%)            | 701/849 (82.6%)                        |
| Other Nordic countries                                | 39/683 (5.7%)                  | 42/697 (6.0%)                          | 8/161 (5.0%)                       | 12/152 (7.9%)                          | 47/844 (5.6%)              | 54/849 (6.4%)                          |
| Europe outside Nordic<br>countries                    | 10/683 (1.5%)                  | 9/697 (1.3%)                           | 3/161 (1.9%)                       | 3/152 (2.0%)                           | 13/844 (1.5%)              | 12/849 (1.4%)                          |
| Outside Europe                                        | 72/683 (10.5%)                 | 65/697 (9.3%)                          | 20/161 (12.4%)                     | 17/152 (11.2%)                         | 92/844 (10.9%)             | 82/849 (9.7%)                          |

|                                                                |                           |                           |                |                |                           |                           |
|----------------------------------------------------------------|---------------------------|---------------------------|----------------|----------------|---------------------------|---------------------------|
| <b>Highest education</b>                                       |                           |                           |                |                |                           |                           |
| Primary school ≤ 9 years                                       | 31/657 (4.7%)             | 37/675 (5.4%)             | 9/152 (5.9%)   | 9/148 (6.1%)   | 40/809 (4.9%)             | 46/823 (5.8%)             |
| High school 9 to 12 years                                      | 207/657 (31.5%)           | 237/675 (35.1%)           | 51/152 (33.6%) | 45/148 (30.4%) | 258/809 (31.9%)           | 282/823 (34.3%)           |
| University or corresponding                                    | 419/657 (63.8%)           | 401/675 (59.4%)           | 92/152 (60.5%) | 94/148 (63.5%) | 511/809 (63.2%)           | 495/823 (60.1%)           |
| <b>Gestational age at delivery (days)</b>                      |                           |                           |                |                |                           |                           |
| Mean (SD)                                                      | 288.9 (1.3)               | 291.9 (2.6)               | 289.2 (1.4)    | 291.8 (2.7)    | 289.0 (1.4)               | 291.9 (2.7)               |
| Median (interquartile range)                                   | 289 (288; 289)            | 292 (290; 294)            | 289 (288; 290) | 292 (290; 295) | 289 (288; 289)            | 292 (290; 294)            |
| <b>Time from admittance to labour ward to delivery (hours)</b> |                           |                           |                |                |                           |                           |
| Mean (SD)                                                      | 19.7 (14.6)               | 13.9 (12.9)               | 21.2 (17.4)    | 14.1 (12.3)    | 20.0 (15.2)               | 13.9 (12.8)               |
| Median (interquartile range)                                   | 15.9 (8.8; 27.5)<br>n=721 | 10.4 (4.6; 18.6)<br>n=734 | 17.1 (9; 29)   | 10.1 (5; 20)   | 15.9 (8.8; 27.9)<br>n=901 | 10.4 (4.6; 18.9)<br>n=898 |
| <b>Onset of birth process</b>                                  |                           |                           |                |                |                           |                           |
| Spontaneous                                                    | 115 (15.9%)               | 489 (66.5%)               | 31 (17.2%)     | 104(63.4%)     | 146 (16.2%)               | 592 (66.0%)               |
| Scheduled caesarean delivery                                   | 1 (0.1%)                  | 0 (0.0%)                  | 0 (0.0%)       | 1 (0.6%)       | 1 (0.1%)                  | 1/899 (0.1%)              |
| Induction                                                      | 606 (83.9%)               | 246 (33.5%)               | 149 (82.8%)    | 59 (36.0%)     | 755 (83.7%)               | 305 (33.9%)               |
| <b>Mode of birth</b>                                           |                           |                           |                |                |                           |                           |
| Spontaneous vaginal                                            | 601 (83.2%)               | 606 (82.4%)               | 149 (82.8%)    | 129 (78.7%)    | 750 (83.1%)               | 735 (81.8%)               |
| Instrumental vaginal                                           | 46 (6.4%)                 | 51 (6.9%)                 | 11 (6.1%)      | 14 (8.5%)      | 95 (10.5%)                | 99 (11.0%)                |
| Caesarean delivery                                             | 75 (10.4%)                | 78 (10.6%)                | 20 (11.1%)     | 21 (12.8%)     | 57 (6.3%)                 | 65 (7.2%)                 |
| <b>Use of epidural anaesthesia</b>                             | 346 (47.9%)               | 345 (46.9%)               | 97 (53.9%)     | 86 (52.4%)     | 443 (49.1%)               | 431 (47.9%)               |
| <b>Maternal complications</b>                                  |                           |                           |                |                |                           |                           |
| Perineal lacerations III-IV                                    | 23 (3.2%)                 | 34 (4.6%)                 | 6 (3.3%)       | 8 (4.9%)       | 29/902 (3.2%)             | 42/899 (4.7%)             |
| Postpartum haemorrhage (>1000 ml)                              | 68 (9.4%)                 | 88 (12%)                  | 18 (10.0%)     | 13 (7.9%)      | 86/902 (9.5%)             | 101/899 (11.2%)           |
| Postpartum infection                                           | 22 (3.0%)                 | 16 (2.2%)                 | 5 (2.8%)       | 5 (3.0%)       | 27/902 (3.0%)             | 21/899 (2.3%)             |
| Preeclampsia/gestational hypertension/eclampsia                | 14 (1.9%)                 | 26 (3.5%)                 | 3 (1.7%)       | 2 (1.2%)       | 17/902 (1.9%)             | 28/899 (3.1%)             |

|                                                    |                   |                   |                            |                            |                            |                            |
|----------------------------------------------------|-------------------|-------------------|----------------------------|----------------------------|----------------------------|----------------------------|
| <b>Perinatal complications</b>                     |                   |                   |                            |                            |                            |                            |
| Admittance to neonatal intensive care units (NICU) | 28 (3.9%)         | 34 (4.6%)         | 13 (7.2%)                  | 19 (11.7%)                 | 41/902 (4.5%)              | 53/898 (5.9%)              |
| Macrosomia ( $\geq 4500$ g)                        | 37 (5.1%)         | 58 (7.9%)         | 7 (3.9%)                   | 10 (6.1%)                  | 44/902 (4.9%)              | 68/898 (7.6%)              |
| <b>Girls</b>                                       | 305 (42.2%)       | 340 (46.3%)       | 73/180 (40.6%)             | 69/163 (42.3%)             | 378/902 (41.9%)            | 409/898 (45.5%)            |
| <b>Birth weight (g)</b>                            |                   |                   |                            |                            |                            |                            |
| Mean (SD)                                          | 3796 (406)        | 3859 (424)        | 3891 (373)                 | 3888 (418)                 | 3815 (401)                 | 3865 (423)                 |
| Median (interquartile range)                       | 3783 (3500; 4060) | 3845 (3565; 4120) | 3893 (3621; 4175)<br>n=180 | 3900 (3610; 4190)<br>n=163 | 3804 (3530; 4090)<br>n=902 | 3850 (3570; 4128)<br>n=898 |
